# Supplementary material for: Impact of Translocator Protein 18 kDa (TSPO) Deficiency on Mitochondrial Function and the Inflammatory State of Human C20 Microglia Cells
Source: MDPI journal article supplement (doi:10.3390/cells12060954), 2023-03-21
Supplement: s1 [file s1]

# Impact of Translocator Protein 18 kDa (TSPO) Deficiency on Mitochondrial Function and the Inflammatory State of Human C20 Microglia Cells

Stefanie Bader <sup>†</sup>, Thea Würfel <sup>†</sup>, Tatjana Jahner, Caroline Nothdurfter, Rainer Rupprecht, Vladimir M. Milenkovic and Christian H. Wetzel <sup>\*</sup>

Department of Psychiatry and Psychotherapy, University of Regensburg, 93053 Regensburg, Germany; stefanie.bader@ukr.de (S.B.); thea.wuerfel@web.de (T.W.); tatjana.jahner@ukr.de (T.J.); caroline.nothdurfter@medbo.de (C.N.); rainer.rupprecht@medbo.de (R.R.); vladimir.milenkovic@ukr.de (V.M.M.)

<sup>\*</sup> Correspondence: christian.wetzel@ukr.de; Tel.: +49-941-944-8955

<sup>†</sup> These authors contributed equally to this work.

## SUPPLEMENTARY INFORMATION

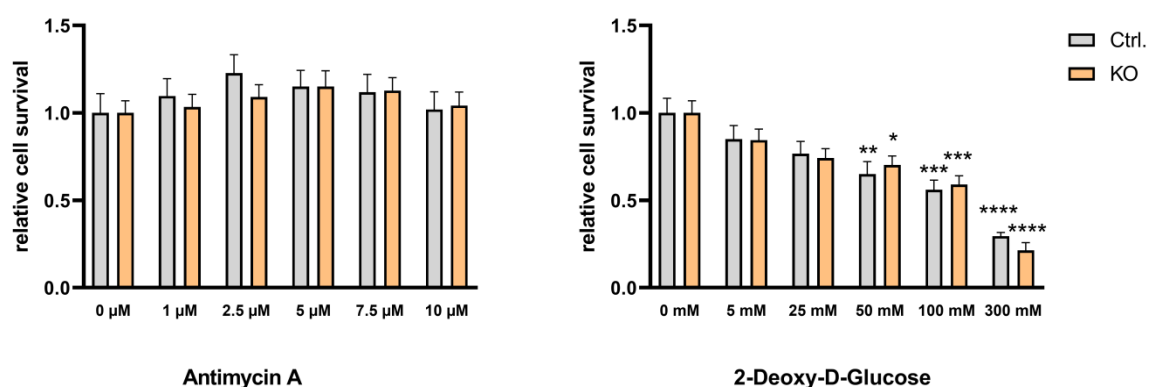

**Supplementary Figure S1:** Effect of Antimycin A and 2-deoxy-D-glucose on viability of cytokine-stimulated TSPO-deficient and control C20 microglia cells. (A) Effect of Antimycin A (1 – 10  $\mu$ M) or (B) 2-deoxy-D-glucose (5 – 300 mM) on cell viability was tested using the Resazurin assay with TSPO-deficient and control C20 cells. Cells were treated with cytokine cocktail TNF $\alpha$ , IL-1 $\beta$  and INF $\gamma$  (each 1 ng/ml) for 16 h. Values represent survival normalized to conditions without Antimycin A or 2-deoxy-D-glucose. Means and p values see supplementary table S1 and S2.

**Supplementary Table S1:** Effect of Antimycin A on viability of cytokine-stimulated TSPO-deficient (KO) and control C20 microglia cells (Viability assessed with Resazurin assay)

| Cell line and condition | Antimycin A concentration | Mean and SEM      | P-value compared to baseline at 0 $\mu$ M |
|-------------------------|---------------------------|-------------------|-------------------------------------------|
| Ctrl. basal             | 0 $\mu$ M                 | 1.000 $\pm$ 0.069 | -                                         |
| Ctrl. basal             | 1 $\mu$ M                 | 1.078 $\pm$ 0.070 | >0.9999                                   |
| Ctrl. basal             | 2.5 $\mu$ M               | 1.139 $\pm$ 0.081 | 0.9917                                    |
| Ctrl. basal             | 5 $\mu$ M                 | 1.146 $\pm$ 0.066 | 0.9870                                    |
| Ctrl. basal             | 7.5 $\mu$ M               | 1.102 $\pm$ 0.078 | 0.9995                                    |
| Ctrl. basal             | 10 $\mu$ M                | 1.008 $\pm$ 0.081 | 0.9999                                    |
| KO basal                | 0 $\mu$ M                 | 1.000 $\pm$ 0.098 | -                                         |
| KO basal                | 1 $\mu$ M                 | 0.956 $\pm$ 0.103 | >0.9999                                   |
| KO basal                | 2.5 $\mu$ M               | 1.053 $\pm$ 0.088 | >0.9999                                   |
| KO basal                | 5 $\mu$ M                 | 1.147 $\pm$ 0.098 | 0.9869                                    |
| KO basal                | 7.5 $\mu$ M               | 1.154 $\pm$ 0.095 | 0.9805                                    |
| KO basal                | 10 $\mu$ M                | 1.098 $\pm$ 0.093 | 0.9996                                    |
| Ctrl. 16h activated     | 0 $\mu$ M                 | 1.000 $\pm$ 0.110 | -                                         |
| Ctrl. 16h activated     | 1 $\mu$ M                 | 1.097 $\pm$ 0.099 | >0.9999                                   |
| Ctrl. 16h activated     | 2.5 $\mu$ M               | 1.228 $\pm$ 0.105 | 0.8178                                    |
| Ctrl. 16h activated     | 5 $\mu$ M                 | 1.150 $\pm$ 0.094 | 0.9893                                    |
| Ctrl. 16h activated     | 7.5 $\mu$ M               | 1.118 $\pm$ 0.102 | 0.9986                                    |
| Ctrl. 16h activated     | 10 $\mu$ M                | 1.019 $\pm$ 0.102 | >0.9999                                   |
| KO 16h activated        | 0 $\mu$ M                 | 1.000 $\pm$ 0.070 | -                                         |
| KO 16h activated        | 1 $\mu$ M                 | 1.034 $\pm$ 0.072 | >0.9999                                   |
| KO 16h activated        | 2.5 $\mu$ M               | 1.091 $\pm$ 0.070 | 0.9999                                    |
| KO 16h activated        | 5 $\mu$ M                 | 1.150 $\pm$ 0.090 | 0.9890                                    |

|                     |             |                   |         |
|---------------------|-------------|-------------------|---------|
| KO 16h activated    | 7.5 $\mu$ M | 1.128 $\pm$ 0.073 | 0.9971  |
| KO 16h activated    | 10 $\mu$ M  | 1.042 $\pm$ 0.077 | >0.9999 |
| Ctrl. 40h activated | 0 $\mu$ M   | 1.000 $\pm$ 0.077 | -       |
| Ctrl. 40h activated | 1 $\mu$ M   | 1.024 $\pm$ 0.081 | >0.9999 |
| Ctrl. 40h activated | 2.5 $\mu$ M | 1.075 $\pm$ 0.077 | >0.9999 |
| Ctrl. 40h activated | 5 $\mu$ M   | 1.026 $\pm$ 0.098 | >0.9999 |
| Ctrl. 40h activated | 7.5 $\mu$ M | 0.966 $\pm$ 0.076 | >0.9999 |
| Ctrl. 40h activated | 10 $\mu$ M  | 0.926 $\pm$ 0.079 | >0.9999 |
| KO 40h activated    | 0 $\mu$ M   | 1.000 $\pm$ 0.082 | -       |
| KO 40h activated    | 1 $\mu$ M   | 0.947 $\pm$ 0.082 | >0.9999 |
| KO 40h activated    | 2.5 $\mu$ M | 1.018 $\pm$ 0.103 | >0.9999 |
| KO 40h activated    | 5 $\mu$ M   | 0.982 $\pm$ 0.109 | >0.9999 |
| KO 40h activated    | 7.5 $\mu$ M | 0.984 $\pm$ 0.104 | >0.9999 |
| KO 40h activated    | 10 $\mu$ M  | 0.897 $\pm$ 0.091 | 0.9995  |

**Supplementary Table S2:** Effect of 2-Deoxy-D-glucose on viability of cytokine-stimulated TSPO-deficient (KO) and control C20 microglia cells (Viability assessed with Resazurin assay)

| Cell line and condition | 2-Deoxy-D-Glucose concentration | Mean and SEM  | P-value compared to baseline at 0 mM |
|-------------------------|---------------------------------|---------------|--------------------------------------|
| Ctrl. basal             | 0 mM                            | 1.000 ±0.0708 | -                                    |
| Ctrl. basal             | 5 mM                            | 0.859 ±0.0731 | 0.8190                               |
| Ctrl. basal             | 25 mM                           | 0.793 ±0.0786 | 0.4263                               |
| KO basal                | 0 mM                            | 1.000 ±0.054  | -                                    |
| KO basal                | 5 mM                            | 0.891 ±0.054  | 0.9819                               |
| KO basal                | 25 mM                           | 0.819 ±0.047  | 0.6296                               |
| KO basal                | 50 mM                           | 0.719 ±0.051  | 0.0752                               |
| Ctrl. 16h activated     | 0 mM                            | 1.000 ±0.083  | -                                    |
| Ctrl. 16h activated     | 5 mM                            | 0.850 ±0.077  | 0.8464                               |
| Ctrl. 16h activated     | 25 mM                           | 0.767 ±0.070  | 0.2522                               |
| KO 16h activated        | 0 mM                            | 1.000 ±0.069  | -                                    |
| KO 16h activated        | 5 mM                            | 0.844 ±0.063  | 0.8088                               |
| KO 16h activated        | 25 mM                           | 0.742 ±0.053  | 0.1385                               |
| Ctrl. 40h activated     | 0 mM                            | 1.000 ±0.087  | -                                    |
| Ctrl. 40h activated     | 5 mM                            | 0.895 ±0.083  | 0.9960                               |
| Ctrl. 40h activated     | 25 mM                           | 0.775 ±0.080  | 0.5332                               |
| Ctrl. 40h activated     | 50 mM                           | 0.668 ±0.076  | 0.0668                               |
| KO 40h activated        | 0 mM                            | 1.000 ±0.089  | -                                    |
| KO 40h activated        | 5 mM                            | 0.897 ±0.070  | 0.9966                               |
| KO 40h activated        | 25 mM                           | 0.806 ±0.062  | 0.7387                               |
| KO 40h activated        | 50 mM                           | 0.678 ±0.086  | 0.0668                               |

**Supplementary Table S3:** Cytokine mRNA expression in TSPO-deficient human C20 microglia cells and control cells after treatment with cytokine cocktail (16 h) and related to unstimulated conditions of control or TSPO-KO cells

|                               | Control mean       | Control P-value | KO mean            | KO P-value |
|-------------------------------|--------------------|-----------------|--------------------|------------|
| <b>TNF<math>\alpha</math></b> | 13.71 $\pm$ 2.845  | 0.0066          | 62.70 $\pm$ 14.62  | 0.0014     |
| <b>IL6</b>                    | 1129 $\pm$ 119.4   | 0.0002          | 1007 $\pm$ 155.2   | <0.0001    |
| <b>IL12A</b>                  | 7.301 $\pm$ 0.7202 | 0.0003          | 4.233 $\pm$ 0.3540 | <0.0001    |
| <b>IL1<math>\beta</math></b>  | 219 $\pm$ 36.70    | 0.0019          | 375.3 $\pm$ 29.78  | <0.0001    |
| <b>IL8</b>                    | 1368 $\pm$ 164.3   | 0.0011          | 2348 $\pm$ 291.6   | <0.0001    |
| <b>NOS2</b>                   | 2.776 $\pm$ 0.5568 | 0.0243          | 2.851 $\pm$ 0.4841 | 0.0065     |
